# Supplementary material for: Pure Alpha vs. Mixed Adrenergic Vasopressors Perioperative Outcomes in Autologous Free Flap Surgery: A Systematic Review and Meta-analysis
Source: Research Square preprint supplement (doi:10.21203/rs.3.rs-7360899/v1), 2025-10-08
Supplement: Supplementary file 1 [file a50f7c32401acf7c3f501d91.docx]

Supplementary table 1. Detailed search strategy.

|  | **SEARCH TERMS** |
| --- | --- |
| 1 | "Free Tissue Flaps"[Mesh] OR "Surgical Flaps"[Mesh] OR "Microsurgery"[Mesh] OR (free AND (flap OR flaps OR microvascular OR microsurgical OR reconstruction)) |
| 2 | "Vasoconstrictor Agents"[Mesh] OR "Adrenergic Agonists"[Mesh] OR "Sympathomimetics"[Mesh] OR vasopressor OR vasoactive OR hemodynamics |
| 3 | "Phenylephrine"[Mesh] OR phenylephrine OR "alpha agonist" OR "alpha-1 agonist" OR "pure alpha agonist" |
| 4 | "Norepinephrine"[Mesh] OR "Ephedrine"[Mesh] OR norepinephrine OR ephedrine OR "mixed agonist" OR "alpha beta agonist" |
| 5 | "Perioperative Period"[Mesh] OR "Intraoperative Period"[Mesh] OR perioperative OR intraoperative OR postoperative |
| 6 | "Treatment Outcome"[Mesh] OR "Postoperative Complications"[Mesh] OR outcomes OR complications OR failure OR success OR thrombosis |
| 7 | ("Randomized Controlled Trial"[Publication Type] OR "Cohort Studies"[Mesh] OR "Case-Control Studies"[Mesh]) |

D
